# Supplementary material for: Meat and Seafood Consumption in Relation to Plasma Metabolic Profiles in a Chinese Population: A Combined Untargeted and Targeted Metabolomics Study
Source: PubMed Central journal article supplement (PMC5537798; doi:10.3390/nu9070683), 2017-06-30
Supplement: nutrients-09-00683-s001.pdf [file nutrients-09-00683-s001.pdf]

Table S1. Reproducibility evaluation of LC-MS and GC-MS based on selected peaks in quality control samples.

| LC-MS, positive ion mode |        |           |                         | LC-MS, negative ion mode |        |           |                         | GC-MS    |        |           |                         |
|--------------------------|--------|-----------|-------------------------|--------------------------|--------|-----------|-------------------------|----------|--------|-----------|-------------------------|
| Peak No.                 | m/z    | R.T.(min) | RSD <sup>a</sup> (100%) | Peak No.                 | m/z    | R.T.(min) | RSD <sup>a</sup> (100%) | Peak No. | m/z    | R.T.(min) | RSD <sup>a</sup> (100%) |
| 1                        | 231.06 | 0.8       | 5.8                     | 1                        | 130.09 | 0.6       | 7.5                     | 1        | 116.09 | 4.8       | 8.6                     |
| 2                        | 144.08 | 1.5       | 9.2                     | 2                        | 203.08 | 1.4       | 10.3                    | 2        | 151.07 | 6.0       | 10.2                    |
| 3                        | 388.25 | 2.9       | 12.1                    | 3                        | 187.00 | 2.5       | 6.9                     | 3        | 142.11 | 7.8       | 6.9                     |
| 4                        | 585.27 | 4.0       | 10.9                    | 4                        | 475.19 | 4.6       | 7.9                     | 4        | 204.13 | 8.8       | 9.2                     |
| 5                        | 465.03 | 5.8       | 8.6                     | 5                        | 381.07 | 5.1       | 12.8                    | 5        | 258.10 | 11.2      | 7.7                     |
| 6                        | 620.44 | 6.8       | 7.7                     | 6                        | 448.31 | 6.1       | 16.4                    | 6        | 295.08 | 15.0      | 9.6                     |
| 7                        | 546.35 | 8.0       | 13.5                    | 7                        | 568.36 | 7.8       | 15.7                    | 7        | 84.09  | 17.3      | 10.2                    |
| 8                        | 640.54 | 10.0      | 9.2                     | 8                        | 595.49 | 9.9       | 13.4                    | 8        | 339.27 | 20.1      | 6.1                     |
| 9                        | 748.53 | 11.9      | 14.8                    | 9                        | 788.58 | 12.7      | 9.8                     | 9        | 285.19 | 23.0      | 10.4                    |
| 10                       | 810.60 | 13.4      | 15.9                    | 10                       | 656.57 | 14.0      | 14.5                    | 10       | 316.20 | 26.3      | 11.6                    |

<sup>a</sup> RSD: relative standard deviation of peak areas.

Table S2. Dietary intake (g/2000 kcal, Mean  $\pm$  SD) of 270 participants by diet groups <sup>a</sup>

| Dietary intake groups     | HMHS eaters (n = 60) | HMLS eaters (n = 64) | LMHS eaters (n = 60) | LMLS eaters (n = 86) | <i>P</i> -values <sup>c</sup> |
|---------------------------|----------------------|----------------------|----------------------|----------------------|-------------------------------|
| Meat                      | 160.96 $\pm$ 59.88   | 205.58 $\pm$ 63.03   | 66.58 $\pm$ 21.42    | 40.31 $\pm$ 26.36    | <0.001                        |
| Red meat                  | 104.23 $\pm$ 52.14   | 141.93 $\pm$ 59.61   | 35.31 $\pm$ 18.73    | 14.27 $\pm$ 8.41     | <0.001                        |
| Poultry                   | 56.73 $\pm$ 38.21    | 63.65 $\pm$ 37.36    | 31.26 $\pm$ 16.59    | 26.04 $\pm$ 21.96    | <0.001                        |
| Seafood                   | 180.24 $\pm$ 45.39   | 78.51 $\pm$ 25.65    | 223.32 $\pm$ 59.96   | 34.38 $\pm$ 18.37    | <0.001                        |
| Fish                      | 147.30 $\pm$ 41.43   | 60.20 $\pm$ 24.53    | 198.30 $\pm$ 62.14   | 23.43 $\pm$ 13.81    | <0.001                        |
| Shellfish                 | 32.94 $\pm$ 23.29    | 18.31 $\pm$ 12.35    | 25.02 $\pm$ 15.92    | 10.95 $\pm$ 8.46     | <0.001                        |
| Vegetables                | 249.49 $\pm$ 104.51  | 274.11 $\pm$ 103.86  | 261.32 $\pm$ 164.46  | 250.99 $\pm$ 187.03  | 0.763                         |
| Fruits <sup>b</sup>       | 285.17 $\pm$ 177.90  | 315.63 $\pm$ 212.91  | 411.10 $\pm$ 266.67  | 351.33 $\pm$ 216.22  | 0.013                         |
| Grains                    |                      |                      |                      |                      |                               |
| Whole grains <sup>b</sup> | 4.74 $\pm$ 9.73      | 6.59 $\pm$ 11.20     | 6.72 $\pm$ 9.90      | 12.62 $\pm$ 18.88    | 0.003                         |
| Refined grains            | 383.68 $\pm$ 106.40  | 386.39 $\pm$ 124.93  | 390.48 $\pm$ 116.74  | 382.95 $\pm$ 114.40  | 0.982                         |
| Other                     |                      |                      |                      |                      |                               |
| Soy products <sup>b</sup> | 12.05 $\pm$ 9.02     | 13.91 $\pm$ 10.94    | 16.65 $\pm$ 16.49    | 21.74 $\pm$ 24.50    | 0.005                         |
| Dairy                     | 102.65 $\pm$ 161.16  | 90.75 $\pm$ 132.06   | 100.60 $\pm$ 136.56  | 145.92 $\pm$ 175.90  | 0.120                         |

|                            |                  |                  |                  |                  |       |
|----------------------------|------------------|------------------|------------------|------------------|-------|
| Eggs                       | 32.03 ± 14.72    | 27.87 ± 18.08    | 30.08 ± 23.13    | 25.76 ± 18.49    | 0.222 |
| Nuts and seeds             | 3.39 ± 4.07      | 3.04 ± 3.45      | 4.57 ± 5.19      | 4.50 ± 6.27      | 0.188 |
| Total energy intake (kcal) | 2125.30 ± 574.65 | 2058.24 ± 555.32 | 1896.30 ± 525.76 | 1970.50 ± 534.17 | 0.104 |

---

<sup>a</sup> HMHS, high meat and high seafood; HMLS, high meat and low seafood; LMHS, low meat and high seafood; LMLS, low meat and low seafood.

<sup>b</sup> *P*-values of 0.006 (fruits), 0.497 (whole grains), and 0.131 (soy products) were obtained when compared among HMHS, HMLS, and LMHS eaters.

<sup>c</sup> *P*-values were calculated by one-way ANOVA

Table S3. Optimized MRM conditions for determination of 16 amino acids

| Compounds      | R. T. (min) | Transition ion (m/z) | Fragmentor voltage (V) | CE (eV) |
|----------------|-------------|----------------------|------------------------|---------|
| Phenylalanine  | 8.53        | 166.1 -> 120.1       | 90                     | 14      |
| Tryptophan     | 8.58        | 205.1 -> 146.0       | 70                     | 18      |
| Leucine        | 8.97        | 132.1 -> 86.1        | 90                     | 10      |
| Iso-leucine    | 9.61        | 132.1 -> 86.1        | 90                     | 10      |
| Methionine     | 10.44       | 150.1 -> 104.0       | 90                     | 10      |
| Tyrosine       | 11.52       | 182.1 -> 136.0       | 90                     | 16      |
| Valine         | 11.59       | 118.1 -> 72.1        | 90                     | 10      |
| Proline        | 11.61       | 116.1 -> 70.0        | 90                     | 14      |
| Hydroxyproline | 12.59       | 132.1 -> 68.0        | 100                    | 16      |
| Alanine        | 12.67       | 90.1 -> 44.0         | 70                     | 10      |
| Threonine      | 13.37       | 120.1 -> 74.0        | 90                     | 20      |
| Glycine        | 13.77       | 76.0 -> 30.0         | 70                     | 6       |
| Glutamine      | 14.22       | 147.1 -> 84.0        | 70                     | 16      |
| Serine         | 14.26       | 106.1 -> 60.0        | 90                     | 8       |
| Asparagine     | 14.38       | 133.1 -> 74.0        | 70                     | 14      |
| Lysine         | 15.42       | 147.1 -> 84.0        | 90                     | 14      |

Table S4. Optimized MRM conditions for determination of 19 fatty acid methyl esters

| Fatty acid methyl esters                                | R. T.<br>(min) | Transition ion<br>(m/z) | CE<br>(eV) |
|---------------------------------------------------------|----------------|-------------------------|------------|
| Pentadecylic acid methyl ester (C15:0)                  | 11.00          | 257 -> 57               | 10         |
| Palmitic acid methyl ester (C16:0)                      | 11.80          | 271 -> 103              | 20         |
| Palmitoleic acid methyl ester (C16:1)                   | 12.89          | 269 -> 219              | 12         |
| Margaric acid methyl ester (C17:0)                      | 12.66          | 285 -> 103              | 10         |
| cis-10-Heptadecenoic Acid methyl ester (C17:1)          | 12.99          | 283 -> 233              | 10         |
| Stearic acid methyl ester (C18:0)                       | 13.62          | 299 -> 103              | 20         |
| Elaidic acid methyl ester (C18:1n9t)                    | 13.78          | 297 -> 247              | 10         |
| Oleic acid methyl ester (C18:1n9c)                      | 13.91          | 297 -> 247              | 10         |
| Linoleic acid methyl ester (C18:2n6c)                   | 14.44          | 293 -> 95               | 15         |
| $\gamma$ -Linolenic acid methyl ester (C18:3n6)         | 14.78          | 293 -> 95               | 15         |
| $\alpha$ -Linolenic acid methyl ester (C18:3n3)         | 15.12          | 293 -> 95               | 15         |
| Arachidic acid methyl ester (C20:0)                     | 15.70          | 327 -> 57               | 10         |
| cis-11-Eicosenoic Acid methyl ester (C20:1n9)           | 16.02          | 325 -> 275              | 10         |
| cis-11,14-Eicosadienoic Acid methyl ester (C20:2n6)     | 16.62          | 321 -> 81               | 10         |
| cis-8,11,14-Eicosadienoic Acid methyl ester (C20:3n6)   | 16.99          | 321 -> 81               | 10         |
| cis-11,14,17-Eicosatrienoic Acid methyl ester (C20:3n3) | 17.37          | 321 -> 81               | 10         |
| AA methyl ester (C20:4n6)                               | 17.22          | 319 -> 95               | 10         |
| EPA methyl ester (C20:5n3)                              | 18.02          | 317 -> 161              | 18         |
| DHA methyl ester (C22:6n3)                              | 21.25          | 343 -> 95               | 20         |

Table S5. AUC values of 42 metabolites by comparing the top and the bottom quintiles of meat and seafood consumption

| Metabolites                             | AUC (95% CI)      |
|-----------------------------------------|-------------------|
| <b>Untargeted analysis</b>              |                   |
| <i>AA-content glycerophospholipids</i>  |                   |
| PC (36:4)                               | 0.69 (0.59, 0.79) |
| PC (38:4)                               | 0.68 (0.58, 0.78) |
| PC (p36:4)                              | 0.75 (0.66, 0.85) |
| PC (o36:4)                              | 0.71 (0.61, 0.81) |
| PC (o38:5)                              | 0.70 (0.60, 0.80) |
| PE (p36:4)                              | 0.78 (0.69, 0.87) |
| PE (p38:4)                              | 0.73 (0.63, 0.83) |
| PE (p38:5)                              | 0.73 (0.64, 0.83) |
| <i>EPA-content glycerophospholipids</i> |                   |
| PC (36:5)                               | 0.84 (0.76, 0.91) |
| PE (p36:5)                              | 0.84 (0.76, 0.91) |
| <i>DHA-content glycerophospholipids</i> |                   |
| LPC (22:6)                              | 0.80 (0.71, 0.88) |
| PC (38:6)                               | 0.85 (0.78, 0.92) |
| PC (40:6)                               | 0.85 (0.78, 0.92) |
| PC (40:7)                               | 0.67 (0.57, 0.78) |
| PC (o38:6)                              | 0.82 (0.74, 0.89) |
| PC (p40:6)                              | 0.80 (0.71, 0.88) |

|            |                   |
|------------|-------------------|
| LPE (22:6) | 0.74 (0.65, 0.84) |
| PE (38:6)  | 0.72 (0.63, 0.82) |
| PE (40:6)  | 0.76 (0.67, 0.85) |
| PE (40:9)  | 0.72 (0.62, 0.81) |
| PE (p38:6) | 0.84 (0.77, 0.92) |

*non-AA/EPA/DHA-content glycerophospholipids*

|            |                   |
|------------|-------------------|
| PC (34:2)  | 0.66 (0.56, 0.76) |
| PC (36:2)  | 0.65 (0.55, 0.75) |
| PC (36:4)  | 0.67 (0.57, 0.77) |
| PC (o34:1) | 0.69 (0.59, 0.79) |
| LPE (18:1) | 0.65 (0.54, 0.75) |
| LPE (18:2) | 0.74 (0.65, 0.83) |
| PE (36:3)  | 0.73 (0.63, 0.82) |
| PI (34:2)  | 0.74 (0.65, 0.84) |
| PI (36:2)  | 0.67 (0.57, 0.77) |
| PI (38:3)  | 0.71 (0.61, 0.81) |

*Other*

|           |                   |
|-----------|-------------------|
| D-Glucose | 0.71 (0.61, 0.81) |
| CMPF      | 0.80 (0.71, 0.88) |

**Targeted analysis**

*Amino acids*

|                |                   |
|----------------|-------------------|
| Glycine        | 0.64 (0.54, 0.75) |
| Hydroxyproline | 0.80 (0.71, 0.88) |

|                          |                   |
|--------------------------|-------------------|
| Lysine                   | 0.67 (0.57, 0.77) |
| Threonine                | 0.59 (0.48, 0.70) |
| Tryptophan               | 0.72 (0.63, 0.82) |
| Valine                   | 0.67 (0.57, 0.77) |
| <i>Total fatty acids</i> |                   |
| AA                       | 0.71 (0.62, 0.81) |
| EPA                      | 0.82 (0.74, 0.90) |
| DHA                      | 0.85 (0.78, 0.92) |

---



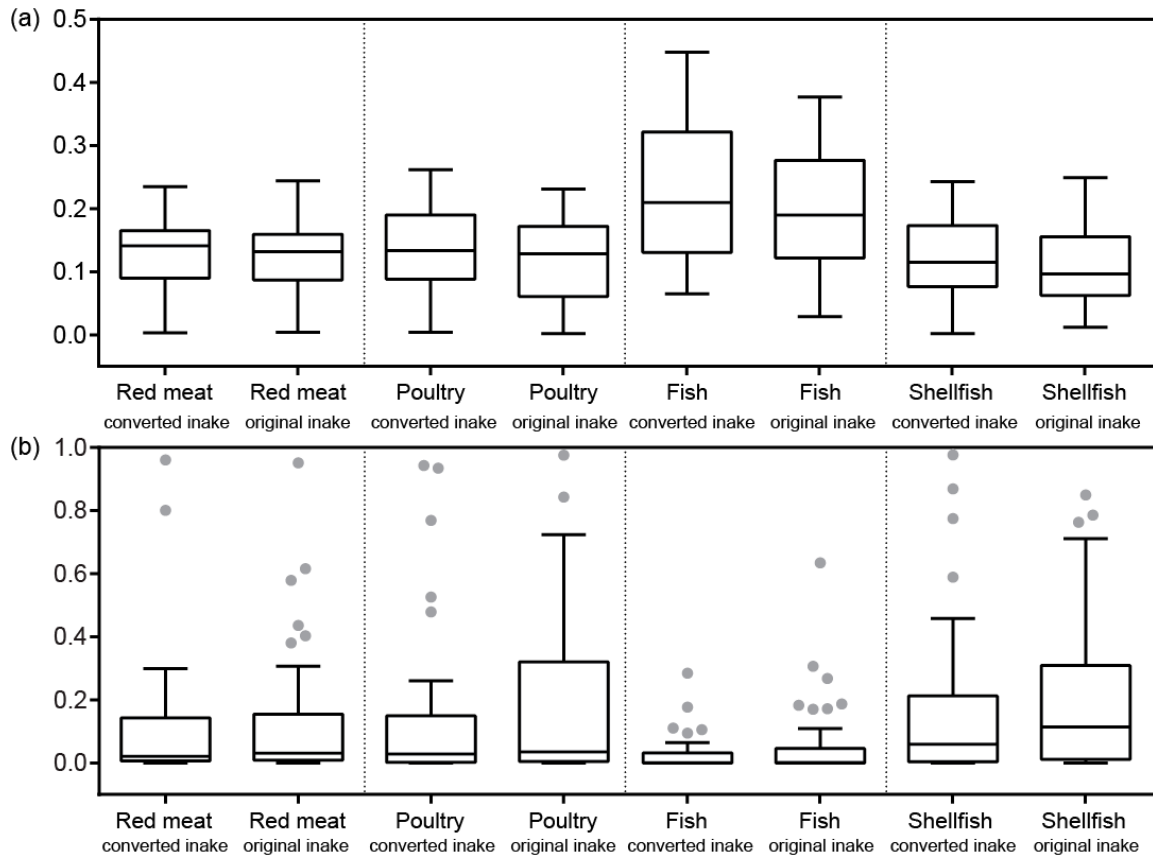

Figure S1. The association between food consumption and plasma metabolic profile: (a) Pearson correlation coefficient was calculated based on 42 differential metabolites, respectively; (b) the p values of correlation coefficient.

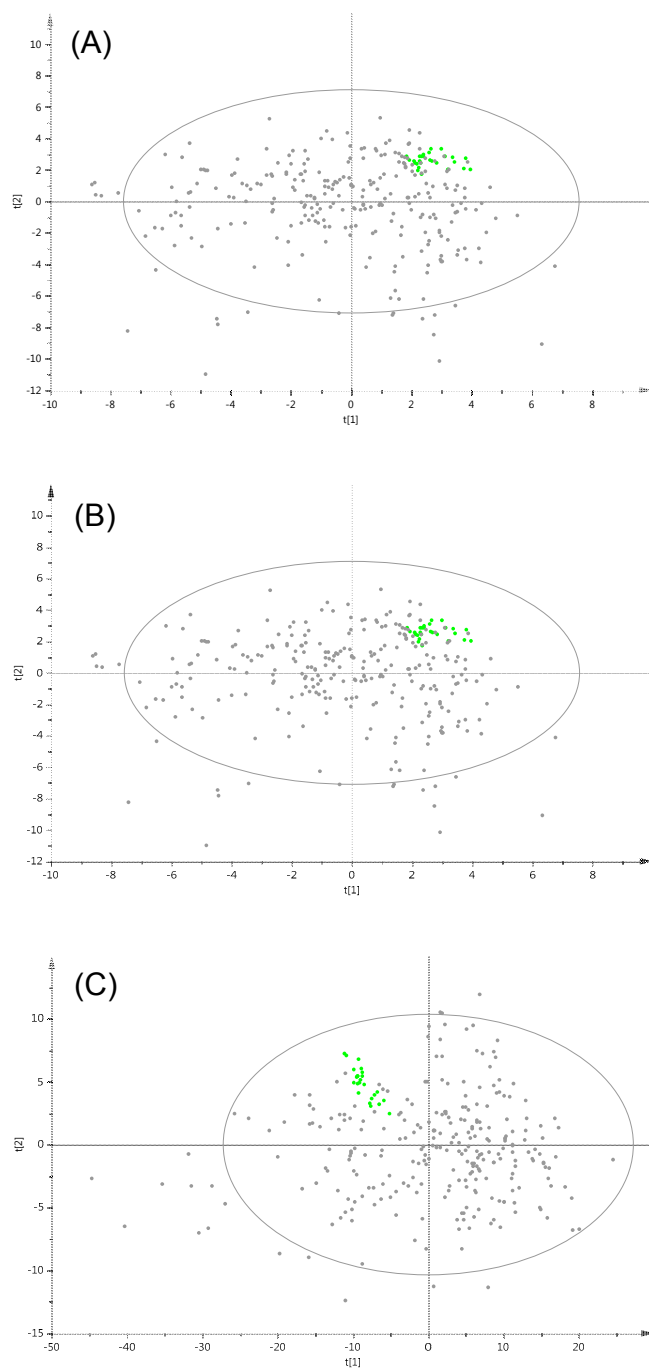

Figure S2. Principal component analysis (PCA) score scatter plots of all plasma (grey dots,  $n = 270$ ) and QC (green dots,  $n = 27$ ) samples. (A) LC-MS, positive ion mode,  $R^2X$  (cum) = 0.344,  $Q^2$  (cum) = 0.134; (B) LC-MS, negative ion mode,  $R^2X$  (cum) = 0.641,  $Q^2$  (cum) = 0.206; (C) GC-MS,  $R^2X$  (cum) = 0.868,  $Q^2$  (cum) = 0.836.

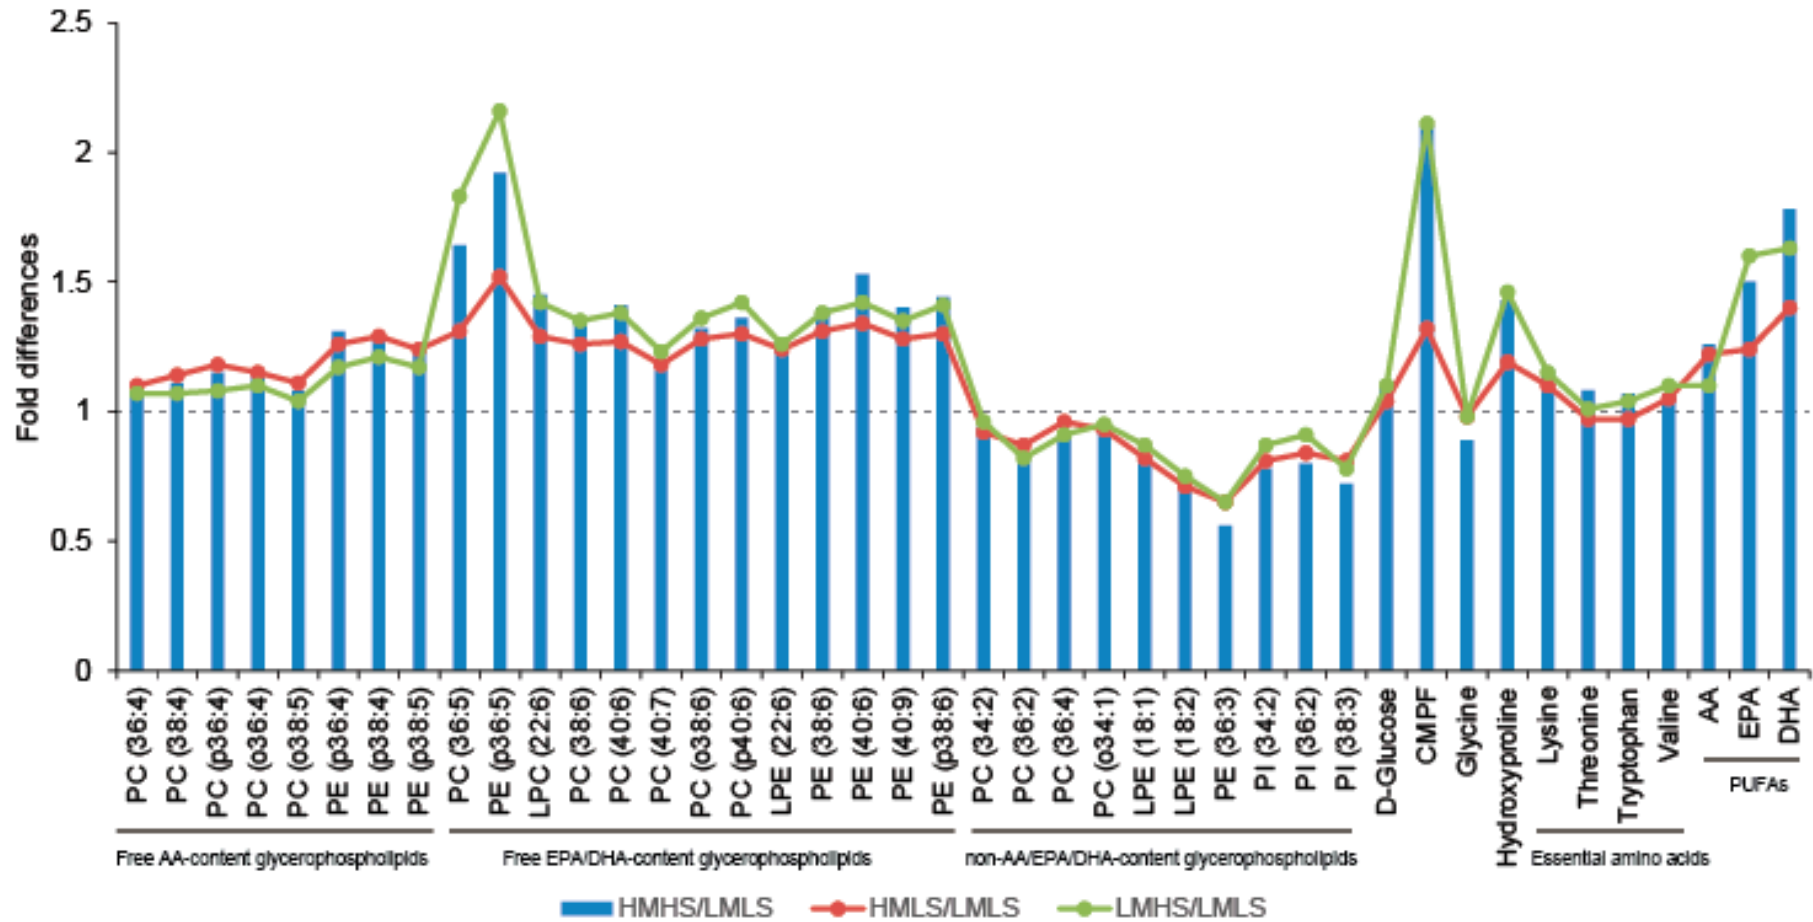

Figure S3. Fold differences of plasma metabolites in HMHS, HMLS and LMHS consumers by comparison with LMLS consumers. HMHS, high meat and high seafood; HMLS, high meat and low seafood; LMHS, low meat and high seafood, LMLS, low meat and low seafood.
